# Supplementary material
Source: PubMed Central journal article supplement (PMC10326595)
Supplement: ajcr0013-2234-f11.pdf [file ajcr0013-2234-f11.pdf]

## A multicenter population-based study

### Supplement Material

1. Breast cancer patients with estrogen receptor negative, progesterone receptor negative, and human epidermal growth factor 2 positive (ER-PR-HER2+) from SEER database.

Inclusion criteria were as follows:

- 1) BC was the patients' one and only cancer that had been identified;
- 2) All cancer patients showed histopathological and morphological evidence in accordance with the International Classification of Cancer Diseases Edition III (ICD-O-3);
- 3) The molecular subtype of breast cancer is ER-PR-HER2+.

Exclusion criteria were as follows:

- 1) Patients suffering from two or more primary cancers (N=5048);
- 2) Patients with T0 stage (N=56);
- 3) Patients with M1 or unknown M stage (N=1865).

2. Breast cancer patients with estrogen receptor negative, progesterone receptor negative, and human epidermal growth factor 2 negative (ER-PR-HER2-) from SEER database.

Inclusion criteria were as follows:

- 1) BC was the patients' one and only cancer that had been identified;
- 2) All cancer patients showed histopathological and morphological evidence in accordance with the International Classification of Cancer Diseases Edition III (ICD-O-3);
- 3) The molecular subtype of breast cancer is ER-PR-HER2-.

Exclusion criteria were as follows:

- 1) Patients suffering from two or more primary cancers (N=14515);
- 2) Patients with T0 stage (N=119);
- 3) Patients with M1 or unknown M stage (N=2816).

Follow up is sustained until patients died, loss to follow-up, or December 31, 2019.

## A multicenter population-based study

**Supplementary Table 1.** Baseline characteristics of single PR positive breast cancer patients included from our hospital

| Name          | Marital   | Median | Age   | Race  | Grade | Hist   | T  | N  | Surgery | Radiation | Chemotherapy | Neoadjuvant | HER2 | Endocrine therapy | survival_month | status |
|---------------|-----------|--------|-------|-------|-------|--------|----|----|---------|-----------|--------------|-------------|------|-------------------|----------------|--------|
| Not available | Married   | NA     | 40-   | Other | II    | IDC    | NA | NA | 1       | 1         | 1            | 0           | 1    | Initial           | 60             | 0      |
| Not available | Married   | NA     | 60-69 | Other | III   | IDC    | T1 | N0 | 1       | 0         | 1            | 0           | 0    | intensify         | 47             | 1      |
| Not available | Married   | NA     | 70-79 | Other | NA    | IDC    | NA | N1 | 1       | 0         | 0            | 1           | 1    | Initial           | 11             | 1      |
| Not available | Married   | NA     | 70-79 | Other | NA    | IDC    | T1 | NA | 1       | 1         | 0            | 0           | 0    | Not given         | 37             | 1      |
| Not available | Married   | NA     | 40-49 | Other | NA    | IDC    | NA | N0 | 1       | 0         | 1            | 0           | 0    | Initial           | 13             | 0      |
| Not available | Married   | NA     | 60-69 | Other | NA    | IDC    | T1 | N1 | 1       | 1         | 1            | 1           | 0    | intensify         | 60             | 0      |
| Not available | Married   | NA     | 40-49 | Other | NA    | No_IDC | T3 | N0 | 1       | 1         | 1            | 1           | 1    | Initial           | 60             | 0      |
| Not available | Married   | NA     | 50-59 | Other | NA    | IDC    | T3 | N1 | 1       | 1         | 1            | 1           | 1    | Initial           | 25             | 1      |
| Not available | Married   | NA     | 50-59 | Other | NA    | IDC    | T2 | N0 | 1       | 0         | 0            | 0           | 1    | intensify         | 9              | 1      |
| Not available | Married   | NA     | 70-79 | Other | NA    | IDC    | T2 | N2 | 1       | 1         | 1            | 1           | 1    | Initial           | 20             | 0      |
| Not available | Married   | NA     | 40-49 | Other | NA    | IDC    | NA | N0 | 1       | 0         | 1            | 0           | 0    | Initial           | 50             | 0      |
| Not available | Married   | NA     | 50-59 | Other | NA    | IDC    | T2 | N1 | 1       | 1         | 1            | 1           | 0    | Initial           | 53             | 0      |
| Not available | Married   | NA     | 50-59 | Other | NA    | IDC    | T4 | N2 | 1       | 1         | 1            | 1           | 1    | intensify         | 22             | 1      |
| Not available | Married   | NA     | 50-59 | Other | NA    | No_IDC | NA | N0 | 1       | 1         | 1            | 0           | 0    | intensify         | 60             | 0      |
| Not available | Married   | NA     | 60-69 | Other | NA    | IDC    | T2 | N1 | 1       | 1         | 1            | 1           | 0    | Initial           | 60             | 0      |
| Not available | Married   | NA     | 60-69 | Other | NA    | IDC    | NA | N0 | 0       | 0         | 1            | 0           | 0    | Initial           | 6              | 1      |
| Not available | Married   | NA     | 60-69 | Other | NA    | IDC    | T1 | N2 | 1       | 1         | 1            | 1           | 0    | Not given         | 17             | 0      |
| Not available | Married   | NA     | 50-59 | Other | II    | IDC    | NA | N0 | 1       | 0         | 1            | 0           | 0    | intensify         | 60             | 0      |
| Not available | Married   | NA     | 40-   | Other | III   | IDC    | T2 | N1 | 1       | 0         | 0            | 1           | 1    | Initial           | 10             | 1      |
| Not available | Unmarried | NA     | 40-49 | Other | NA    | IDC    | T1 | N0 | 1       | 0         | 1            | 0           | 0    | intensify         | 60             | 0      |
| Not available | Married   | NA     | 40-49 | Other | NA    | IDC    | NA | NA | 1       | 0         | 1            | 0           | 0    | intensify         | 45             | 0      |
| Not available | Married   | NA     | 40-49 | Other | NA    | IDC    | T2 | N0 | 1       | 1         | 1            | 0           | 0    | intensify         | 38             | 0      |
